# Supplementary material
Source: PubMed Central journal article supplement (PMC3823684)

# He et al. Figure S1, related to Figure 1

## HCT116

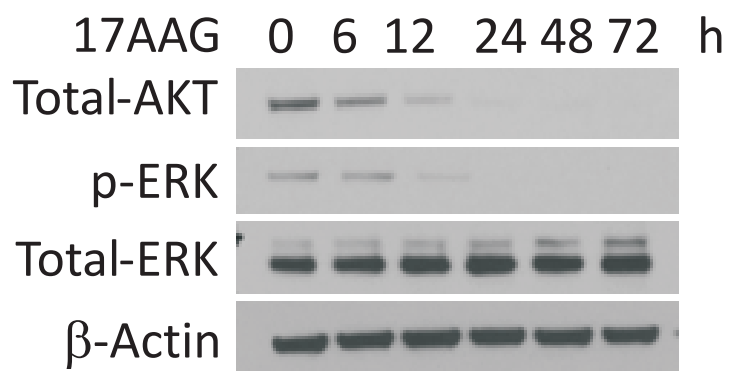

He et al. Figure S2, related to Figure 2

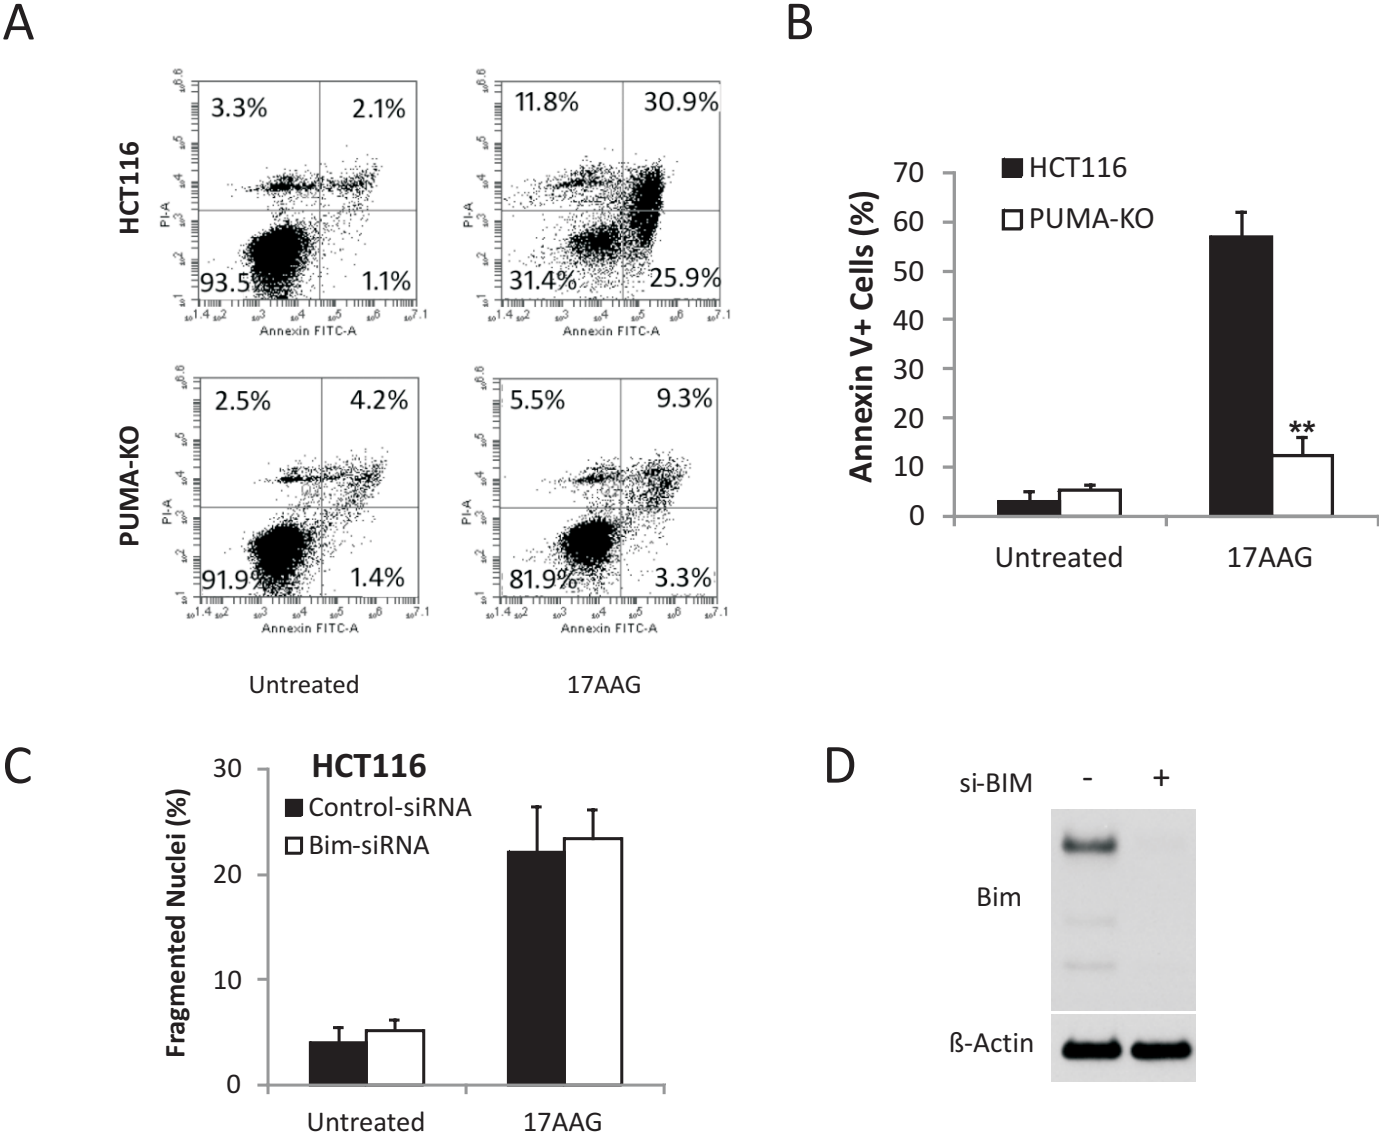

# He et al. Figure S3, related to Fig 2D

## A

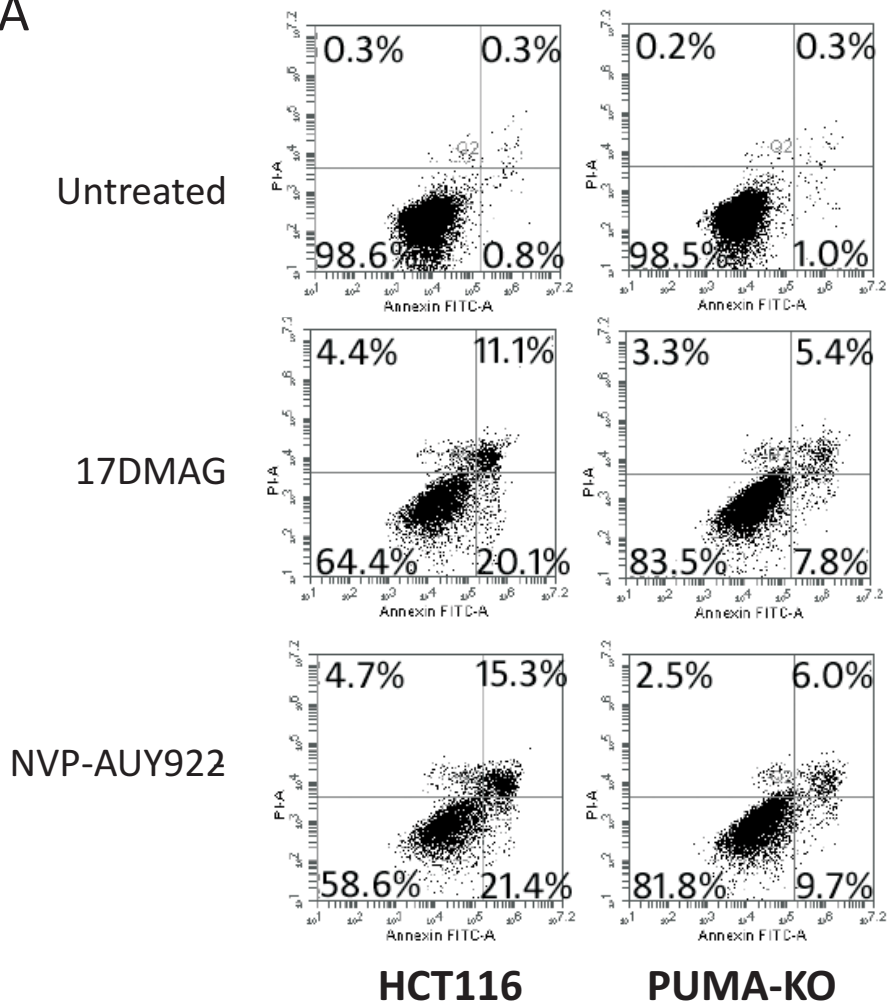

## B

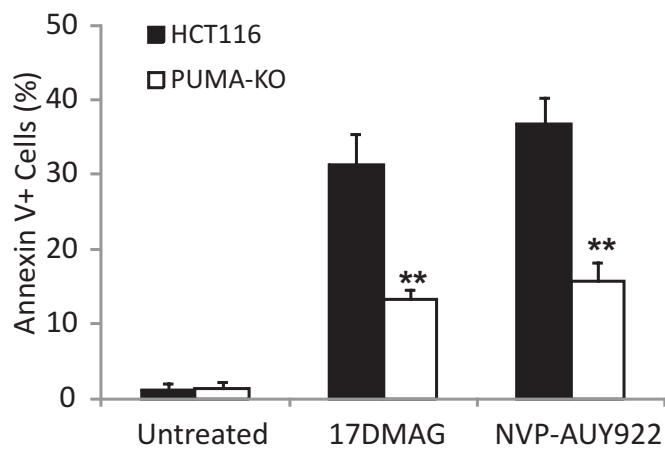

# He et al. Figure S4, related to Figure 4

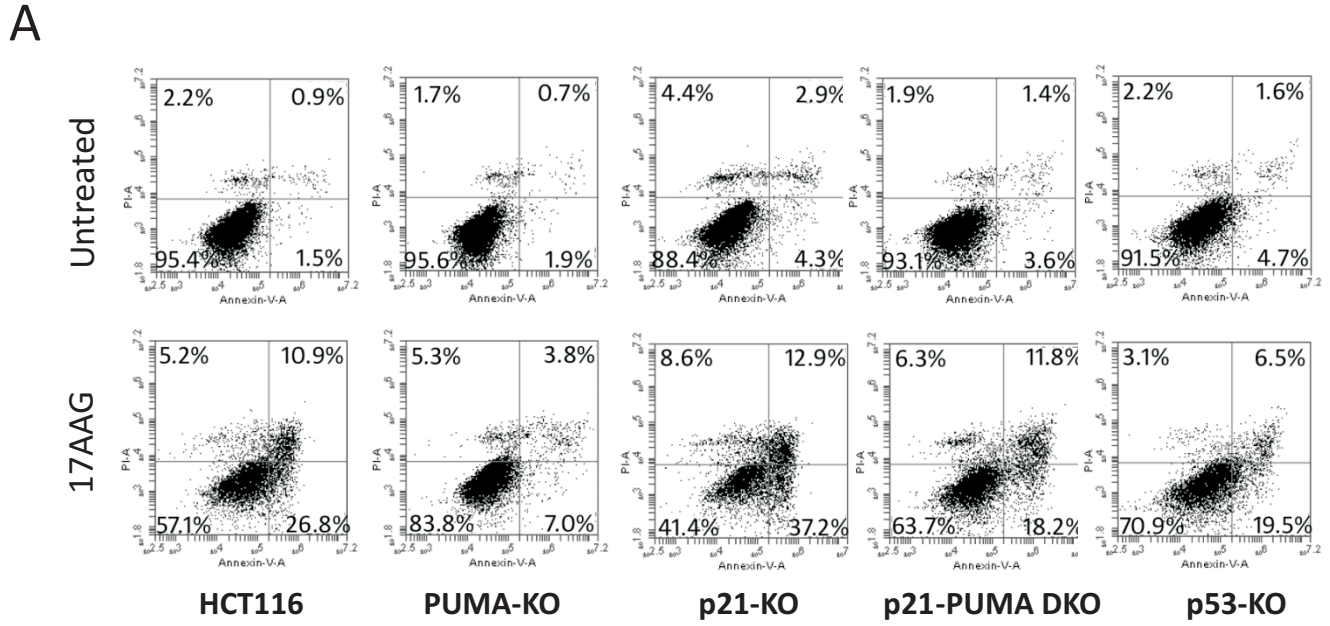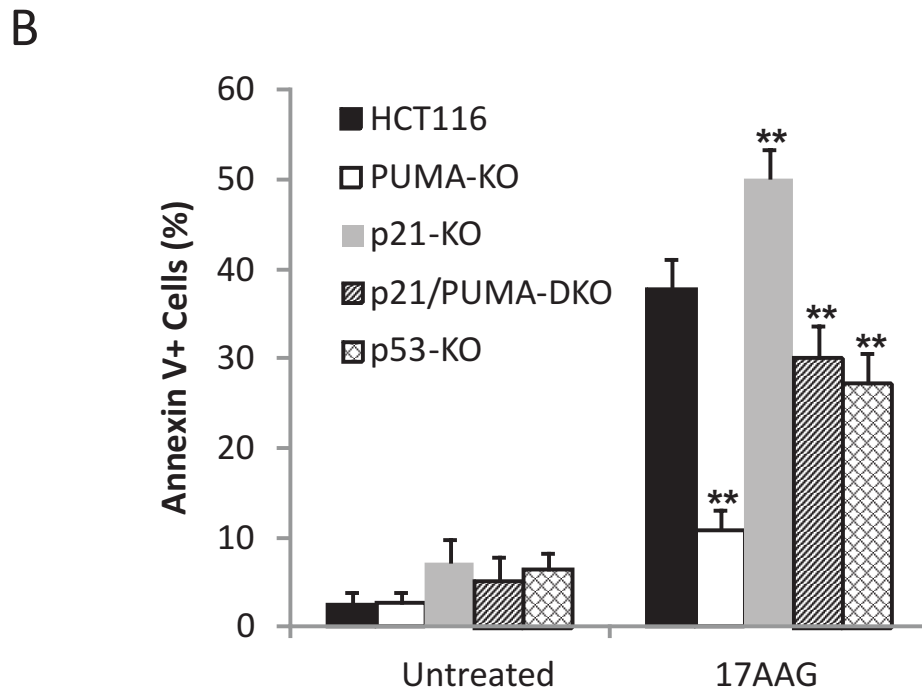

# He et al. Figure S5, related to Figure 5

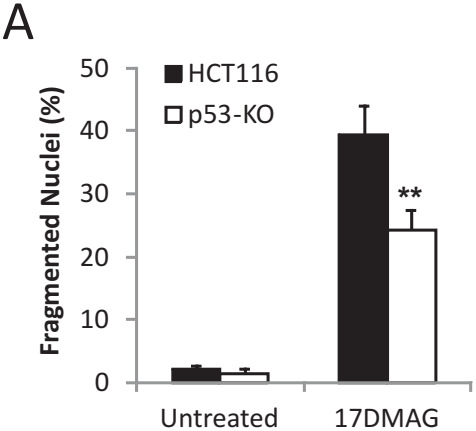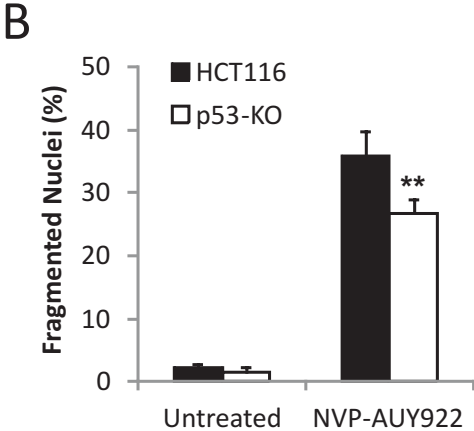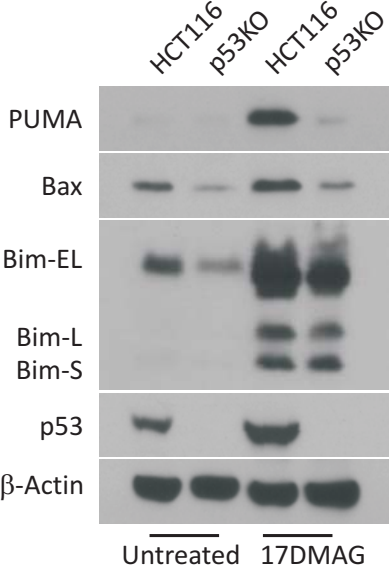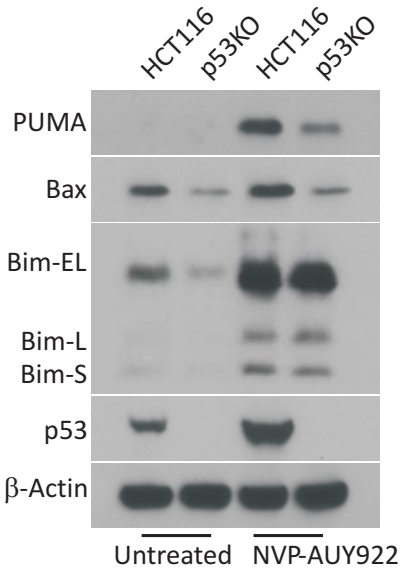

# He et al. Figure S6, related to ER stress in discussion

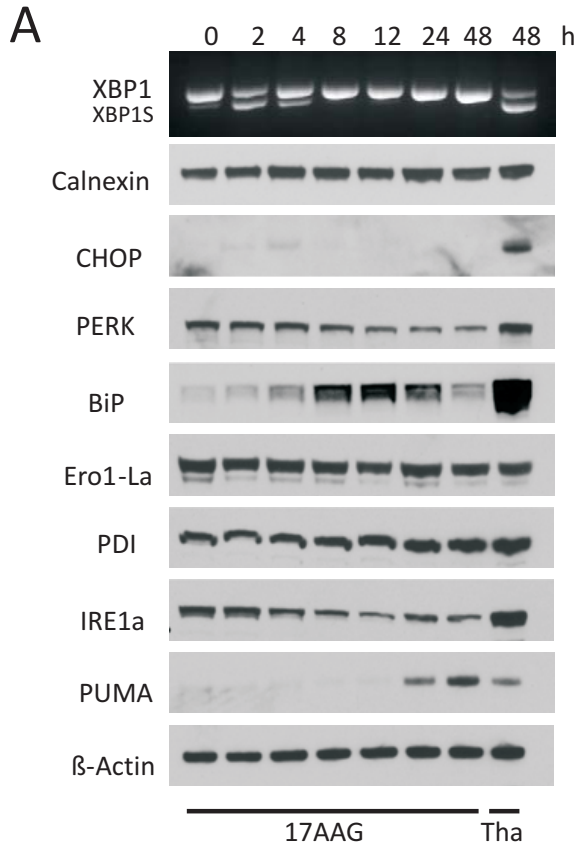

**B**

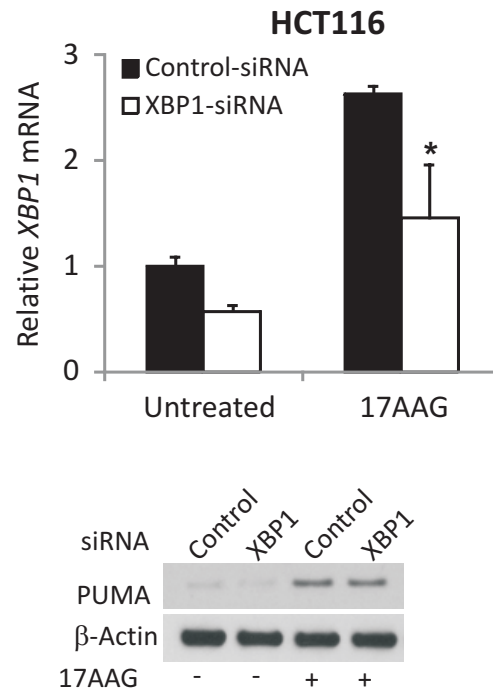

Supplement: NIHMS517936-supplement-2.pdf [file NIHMS517936-supplement-2.pdf]
